# Supplementary material
Source: HighWire-hosted journal article supplement (https://bjo.bmj.com/content/107/7/1018)
Supplement: inline-supplementary-material-1 [file inline-supplementary-material-1.pdf]

Online Supplemental Figure 1. Distribution of peripheral retinal lesions. OD, Right eyes; OS, Left eyes; H1, Round holes; H2, Atrophic holes; H3, Horseshoe tears; L, Lattice degeneration; P, Pigmentary degeneration; S, Snail track degeneration.

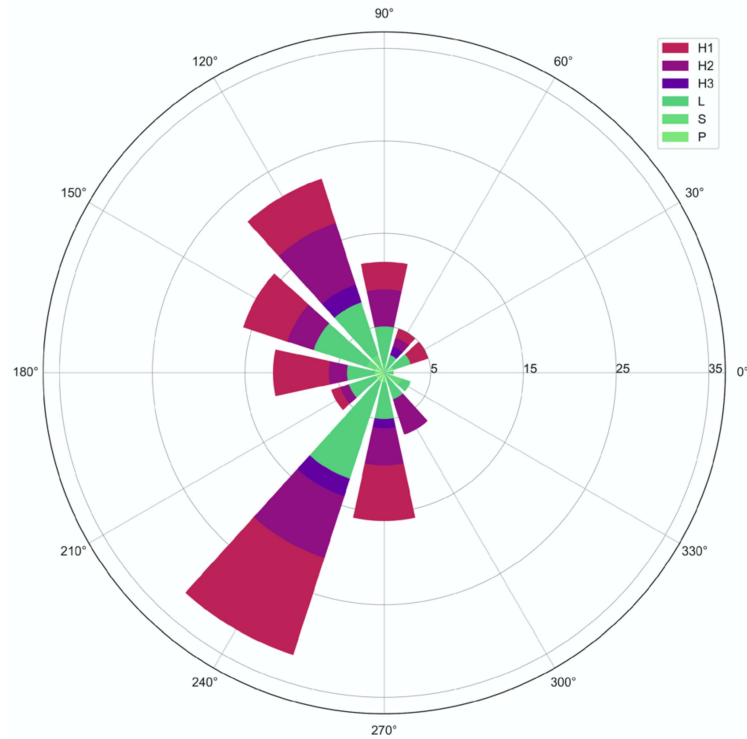

OD Lesions

A

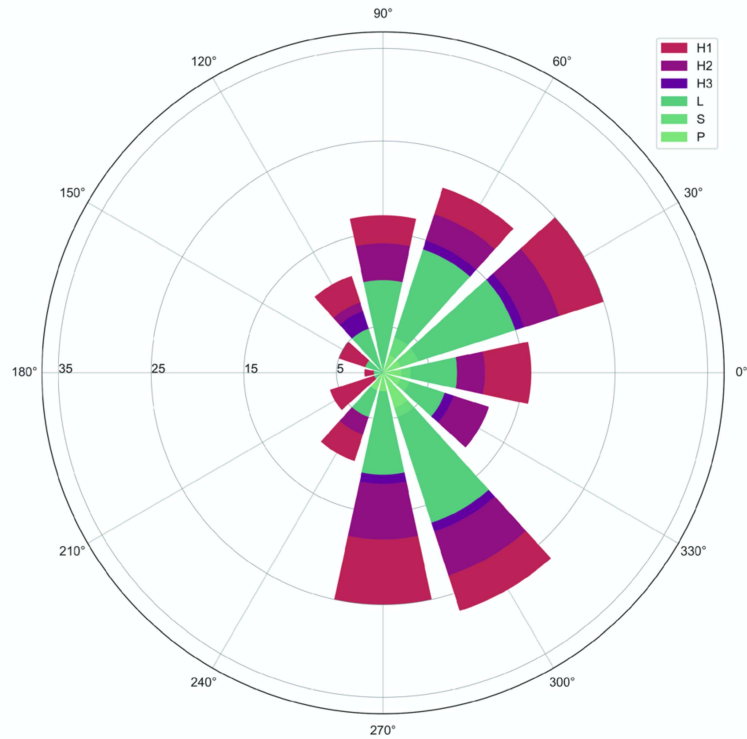

OS Lesions

B

Online Supplemental Table 1. The detection of peripheral retinal lesions of different axial length groups

|                       |                                          |                                                 |                                          |                                                     |                                                 | P value                                                          |                                                          |                                                              |                                                                      |
|-----------------------|------------------------------------------|-------------------------------------------------|------------------------------------------|-----------------------------------------------------|-------------------------------------------------|------------------------------------------------------------------|----------------------------------------------------------|--------------------------------------------------------------|----------------------------------------------------------------------|
| <b>Axial Length</b>   |                                          | Non-mydriatic<br>Optomap<br>Standard<br>(95%CI) | Mydriatic Optomap<br>Standard<br>(95%CI) | Non-mydriatic<br>Optomap<br>eye-steering<br>(95%CI) | Mydriatic<br>Optomap<br>eye-steering<br>(95%CI) | Non-<br>mydriatic<br>Optomap<br>Standard<br>vs. Eye-<br>steering | Mydriatic<br>Optomap<br>Standard<br>vs. Eye-<br>steering | Standard<br>Optomap<br>Non-<br>mydriatic<br>vs.<br>Mydriatic | Eye-<br>steering<br>Optomap<br>Non-<br>mydriatic<br>vs.<br>Mydriatic |
| <b>&lt;26.00 mm</b>   | <b>Eyes with lesions</b>                 | <b>32.35%</b><br>(17.39%,50.53%)                | <b>41.18%</b><br>(26.47%,57.65%)         | <b>67.65%</b><br>(49.47%,82.61%)                    | <b>79.41%</b><br>(62.10%,91.30%)                | <b>&lt;0.001</b>                                                 | <b>&lt;0.001</b>                                         | NS                                                           | NS                                                                   |
|                       | Eyes with lesions<br>needed treatment    | 31.03%<br>(15.28%,50.83%)                       | 37.93%<br>(22.12%,56.80%)                | 72.41%<br>(52.76%,87.27%)                           | 75.86%<br>(56.46%,89.70%)                       | <0.001                                                           | <0.001                                                   | NS                                                           | NS                                                                   |
|                       | Eyes with lesions<br>needed no treatment | 17.65%<br>(3.80%,43.43%)                        | 35.29%<br>(14.21%,61.67%)                | 64.71%<br>(38.33%,85.79%)                           | 82.35%<br>(56.57%,96.20%)                       | 0.001                                                            | <0.01                                                    | NS                                                           | NS                                                                   |
| <b>26.00-28.00 mm</b> | <b>Eyes with lesions</b>                 | <b>43.40%</b><br>(30.60%,57.14%)                | <b>54.72%</b><br>(40.88%,67.86%)         | <b>81.13%</b><br>(68.03%,90.56%)                    | <b>92.45%</b><br>(81.79%,97.91%)                | <b>&lt;0.001</b>                                                 | <b>&lt;0.001</b>                                         | <b>&lt;0.05</b>                                              | <b>&lt;0.01</b>                                                      |
|                       | Eyes with lesions<br>needed treatment    | 38.30%<br>(25.67%,52.73%)                       | 48.94%<br>(35.37%,62.66%)                | 80.85%<br>(66.74%,90.85%)                           | 97.87%<br>(88.71%,99.95%)                       | <0.001                                                           | <0.001                                                   | <0.05                                                        | <0.01                                                                |
|                       | Eyes with lesions<br>needed no treatment | 37.93%<br>(21.84%,57.20%)                       | 48.28%<br>(30.98%,65.99%)                | 75.86%<br>(56.42%,88.41%)                           | 86.21%<br>(68.01%,94.84%)                       | <0.001                                                           | <0.001                                                   | NS                                                           | NS                                                                   |
| <b>&gt;28.00mm</b>    | <b>Eyes with lesions</b>                 | <b>40.91%</b><br>(26.34%,56.75%)                | <b>56.82%</b><br>(41.03%,71.65%)         | <b>75.00%</b><br>(59.66%,86.81%)                    | <b>84.09%</b><br>(69.93%,93.36%)                | <b>&lt;0.001</b>                                                 | <b>0.001</b>                                             | <b>&lt;0.05</b>                                              | NS                                                                   |
|                       | Eyes with lesions<br>needed treatment    | 34.38%<br>(18.57%,53.19%)                       | 53.13%<br>(34.74%,70.91%)                | 78.13%<br>(60.03%,90.72%)                           | 90.63%<br>(74.98%,98.02%)                       | <0.001                                                           | <0.001                                                   | <0.05                                                        | NS                                                                   |
|                       | Eyes with lesions<br>needed no treatment | 50.00%<br>(27.20%,72.80%)                       | 55.00%<br>(35.48%,73.10%)                | 75.00%<br>(50.90%,91.34%)                           | 75.00%<br>(50.53%,89.81%)                       | <0.05                                                            | <0.05                                                    | NS                                                           | NS                                                                   |
